# Supplementary material for: Influence of Dead Cells Killed by Industrial Biocides (BAC and DBNPA) on Biofilm Formation
Source: MDPI journal article supplement (doi:10.3390/antibiotics13020140), 2024-01-31
Supplement: s1 [file s1]

## Supplementary Materials

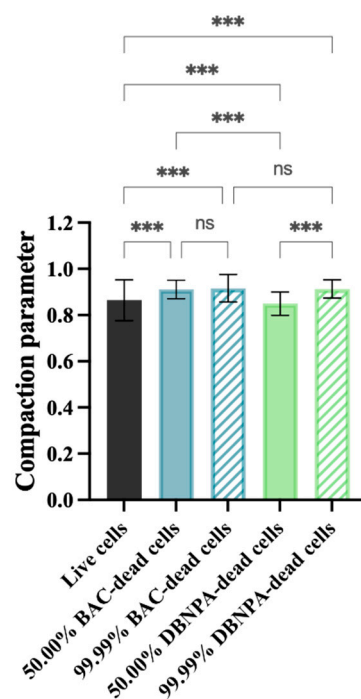

**Figure S1.** Compaction parameter of biofilms formed on PVC coupons of the PPFC under different dead cells ratios. 'ns' indicates not significant ( $p > 0.05$ ), whereas the asterisks indicate statistical significance (\*\* $p < 0.001$ ) using Dunn's multiple comparisons test. The means  $\pm$  SD of three independent experiments with four replicates (coupons) are presented.
